# Supplementary material for: Improved structural variant interpretation for hereditary cancer susceptibility using long-read sequencing
Source: PubMed Central journal article supplement (PMC7605438; doi:10.1038/s41436-020-0880-8), 2020-07-06
Supplement: 41436_2020_880_MOESM1_ESM.pdf [file 41436_2020_880_MOESM1_ESM.pdf]

## **Improved structural variant interpretation for hereditary cancer susceptibility using long-read sequencing**

My Linh Thibodeau MD, MSc<sup>1,2,3\*</sup>, Kieran O'Neill PhD<sup>2\*</sup>, Katherine Dixon MSc<sup>1\*</sup>, Caralyn Reisle BSc<sup>2</sup>, Karen L. Mungall BSc<sup>2</sup>, Martin Krzywinski MSc<sup>2</sup>, Yaoqing Shen PhD<sup>2</sup>, Howard J. Lim MD<sup>4</sup>, Dean Cheng MSc<sup>2</sup>, Kane Tse BSc<sup>2</sup>, Tina Wong BSc<sup>2</sup>, Eric Chuah BSc<sup>2</sup>, Alexandra Fok MSc<sup>2,3</sup>, Sophie Sun MD<sup>3,4</sup>, Daniel Renouf MD<sup>4</sup>, David F. Schaeffer MD<sup>5</sup>, Carol Cremin MSc<sup>1,3</sup>, Stephen Chia MD<sup>4</sup>, Sean Young PhD<sup>5</sup>, Pawan Pandoh BSc<sup>2</sup>, Stephen Pleasance BSc<sup>2</sup>, Erin Pleasance PhD<sup>2</sup>, Andrew J. Mungall PhD<sup>2</sup>, Richard Moore PhD<sup>2</sup>, Stephen Yip MD, PhD<sup>5</sup>, Aly Karsan MD<sup>5</sup>, Janessa Laskin MD<sup>4</sup>, Marco A. Marra PhD<sup>1,2</sup>, Kasmintan A. Schrader MBBS, PhD<sup>1,3†</sup>, Steven J.M. Jones PhD<sup>2†</sup>

<sup>1</sup> Department of Medical Genetics, University of British Columbia, Vancouver, BC, Canada

<sup>2</sup> Canada's Michael Smith Genome Sciences Centre, BC Cancer, Vancouver, BC, Canada

<sup>3</sup> Hereditary Cancer Program, BC Cancer, Vancouver, BC, Canada

<sup>4</sup> Department of Medical Oncology, BC Cancer, Vancouver, BC, Canada

<sup>5</sup> Department of Pathology and Laboratory Medicine, University of British Columbia, Vancouver, BC, Canada

\*MLT, KO and KD contributed equally to this work.

†Co-corresponding authors

## Supplementary Material and Methods

### Supplementary methods

#### *Illumina sequencing*

Germline genome sequencing, tumour genome sequencing and tumour transcriptome sequencing (RNA-seq) was performed for 669 adult patients with primarily metastatic cancers participating in BC Cancer's Personalized OncoGenomics (POG) program in Vancouver, British Columbia, Canada (NCT02155621). Tissue collection, nucleic acid extraction and short-read sequencing library preparation have been previously described<sup>1</sup>. Briefly, DNA was extracted from peripheral blood and from tumour biopsy sections embedded in optimal cutting temperature compound. PCR-free genome libraries were prepared for paired-end genome sequencing, which was performed on the Illumina HiSeq2000, HiSeq2500 or HiSeqX to an average coverage of 40X for peripheral blood and 80X for tumour samples. mRNA was purified from tumour biopsy specimens, converted to cDNA, and paired-end sequencing of strand-specific libraries was performed on Illumina HiSeq instruments to a mean depth of approximately 200 million reads. All Illumina and Nanopore sequencing data for the POG cohort has been deposited in the European Genome-phenome Archive (EGA) under accession EGAS00001001159. Accession number for the individuals described in this study are provided in Table S6.

#### *Germline structural variant calling*

Illumina genome sequencing reads were aligned to the human reference genome version hg19 using Burrows Wheeler Aligner (BWA)-MEM v0.7.6, and duplicate reads were removed using Picard tools v1.92 (<http://broadinstitute.github.io/picard/>)<sup>2</sup>. To improve the sensitivity of structural variant (SV) detection, two computational pipelines were implemented to identify potential pathogenic and likely pathogenic germline SVs. Large copy number variants were called using

the read depth-based tool Control-FREEC, and region-based filtering was used to identify variants overlapping 98 cancer predisposition genes (Table S1)<sup>3</sup>. Known and recurrent technical artifacts were subsequently filtered prior to manual review. SV calling was performed using DELLY v0.7.3, Manta v1.0.0 and Trans-ABYSS v1.4.10, and putative variants identified by each tool were compared, merged and annotated with gene and functional information using MAVIS<sup>4-7</sup>. Gene-based filtering and filtering based on predicted impact to protein-coding regions was performed to identify non-synonymous variants in candidate cancer predisposition genes. Manual review of germline and tumour Illumina genome sequencing data was performed using the Integrated Genomics Viewer (IGV) v2.7.0 to flag suspected technical artifacts and prioritize candidate variants for assessment by Oxford Nanopore long-read sequencing. Five carriers of pathogenic SVs were previously identified through clinical testing and referred to the BC Cancer Hereditary Cancer Program. These variants were used to determine the sensitivity of SV calling from short-read genome sequencing and guide manual data curation of novel variants.

#### *Breakpoint sequence analysis*

Repetitive elements overlapping breakpoints predicted by Illumina and/or Nanopore genome sequencing were identified using the annotated RepeatMasker dataset obtained from the University of California Santa Cruz (UCSC) Table Browser for the reference genome version hg19 (<http://genome.ucsc.edu/>)<sup>8,9</sup>. Sequence identity within  $\pm 150$  bp of predicted breakpoints was evaluated through pairwise sequence alignment using EMBOSS Needle<sup>10</sup>. Percent identity and gaps in pairwise alignments between each corresponding 5' and 3' breakpoint were noted, and each alignment was manually reviewed for regions of microhomology. Genomic features at breakpoint junctions were similarly evaluated through pairwise sequence alignment and manual review, comparing short-read contig sequences, when available, and expected junctional sequences based on the reference genome.

#### *Somatic variant and copy number analysis*

Somatic variants were identified using SAMtools v0.1.17, MutationSeq v1.0.2 and v4.3.5, and Strelka v1.0.6 as previously described<sup>1,11–13</sup>. Somatic single nucleotide variants were classified by base substitution and 5' and 3' nucleotide context into one of 96 possible categories using a published framework<sup>14</sup>. The contribution of 30 somatic SNV signatures defined in the Catalogue of Somatic Mutations (COSMIC) version 2 ([https://cancer.sanger.ac.uk/cosmic/signatures\\_v2](https://cancer.sanger.ac.uk/cosmic/signatures_v2)) to each tumour's somatic SNV profile was then calculated by solving non-negative least squares problems using the R package MutationalPatterns<sup>15</sup>. Somatic copy number calling and loss of heterozygosity (LOH) prediction were performed using CNaseq v0.0.6 and APOLLOH v0.1.1, respectively, and LOH status for pathogenic and likely pathogenic germline SVs was determined through manual review in IGV<sup>16,17</sup>.

#### *RNA-seq analysis*

Paired-end RNA-seq reads were aligned to the hg19 reference genome using Trans-ABYSS v1.4.10, and duplicate reads were marked with Picard tools v1.92. mRNA read support for aberrant splicing and fusion transcript expression associated with germline SVs was computed using TAP, a pipeline for targeted assembly and realignment<sup>18</sup>. Briefly, we classified and filtered RNA-seq reads matching target gene reference sequences and performed *de novo* assembly using Trans-ABYSS. Contigs were aligned to the reference genome and transcriptome using BWA-MEM to characterize splicing events and fusion transcripts, and read support across known and novel splice and fusion junctions was calculated from the number of reads mapping to each contig sequence.



## Supplementary References

1. Jones, M. R. *et al.* Successful targeting of the NRG1 pathway indicates novel treatment strategy for metastatic cancer. *Ann. Oncol.* **28**, 3092–3097 (2017).
2. Li, H. & Durbin, R. Fast and accurate short read alignment with Burrows-Wheeler transform. *Bioinformatics* **25**, 1754–1760 (2009).
3. Boeva, V. *et al.* Control-FREEC: A tool for assessing copy number and allelic content using next-generation sequencing data. *Bioinformatics* **28**, 423–425 (2012).
4. Rausch, T. *et al.* DELLY: Structural variant discovery by integrated paired-end and split-read analysis. *Bioinformatics* **28**, (2012).
5. Chen, X. *et al.* Manta: Rapid detection of structural variants and indels for germline and cancer sequencing applications. *Bioinformatics* **32**, 1220–1222 (2016).
6. Robertson, G. *et al.* De novo assembly and analysis of RNA-seq data. *Nat. Methods* **7**, 909–912 (2010).
7. Reisle, C. *et al.* MAVIS: Merging, annotation, validation, and illustration of structural variants. *Bioinformatics* **35**, 515–517 (2019).
8. Smit, A. F. A., Hubley, R. & Green, P. RepeatMasker Open-3.0. Available at: <http://www.repeatmasker.org>.
9. Karolchik, D. The UCSC Table Browser data retrieval tool. *Nucleic Acids Res.* **32**, 493D – 496 (2004).
10. Needleman, S. B. & Wunsch, C. D. A general method applicable to the search for similarities in the amino acid sequence of two proteins. *J. Mol. Biol.* **48**, 443–453 (1970).
11. Li, H. *et al.* The Sequence Alignment/Map format and SAMtools. *Bioinformatics* **25**, 2078–2079 (2009).
12. Ding, J. *et al.* Feature-based classifiers for somatic mutation detection in tumour-normal paired sequencing data. *Bioinformatics* **28**, 167–175 (2012).

13. Saunders, C. T. *et al.* Strelka: Accurate somatic small-variant calling from sequenced tumor-normal sample pairs. *Bioinformatics* **28**, 1811–1817 (2012).
14. Alexandrov, L. B. *et al.* Signatures of mutational processes in human cancer. *Nature* **500**, 415–421 (2013).
15. Blokzijl, F., Janssen, R., van Boxtel, R. & Cuppen, E. MutationalPatterns: comprehensive genome-wide analysis of mutational processes. *Genome Med.* **10**, 33 (2018).
16. Jones, S. J. *et al.* Evolution of an adenocarcinoma in response to selection by targeted kinase inhibitors. *Genome Biol.* **11**, (2010).
17. Ha, G. *et al.* Integrative analysis of genome-wide loss of heterozygosity and monoallelic expression at nucleotide resolution reveals disrupted pathways in triple-negative breast cancer. *Genome Res.* **22**, 1995–2007 (2012).
18. Chiu, R., Nip, K. M., Chu, J. & Birol, I. TAP: a targeted clinical genomics pipeline for detecting transcript variants using RNA-seq data. *BMC Med. Genomics* **11**, 79 (2018).

**Supplementary Figure S1.** Illumina and Oxford Nanopore genome sequencing data indicating a recurrent intronic inverted duplication on chromosome 16p13 in Case 1

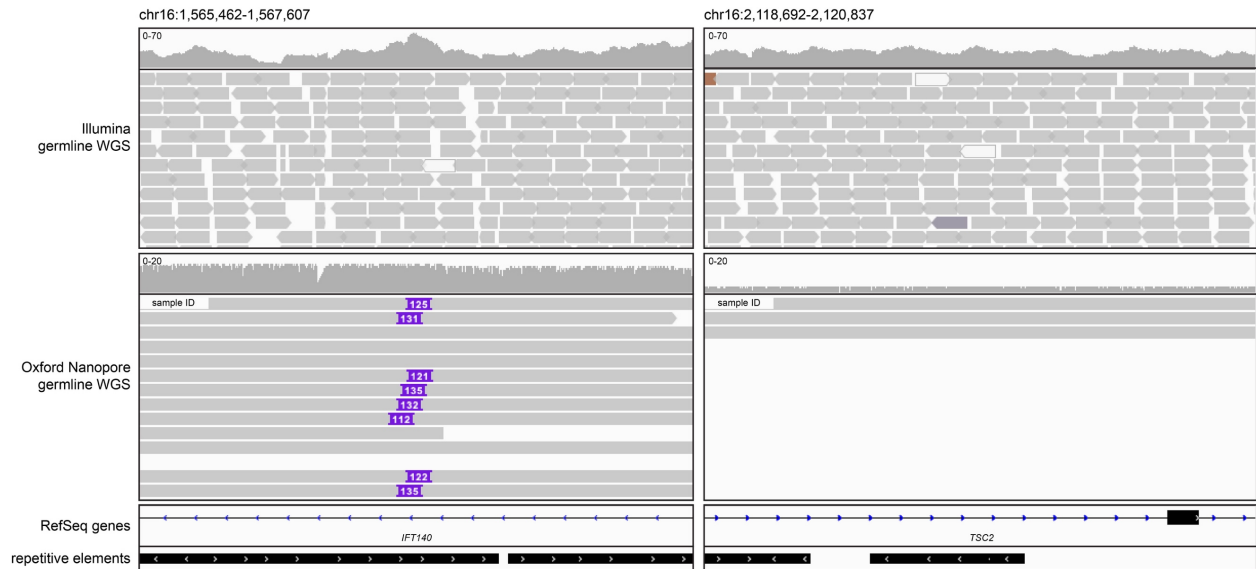

Illumina and Oxford Nanopore genome sequencing data for Case 1 visualized using IGV at the loci of *IFT140* and *TSC2*. Paired-end reads mapping to intron 30 of *IFT140* and intron 16 of *TSC2* are shown in parallel and coloured by strand. 133 bp and 136 bp insertions were found in two Nanopore reads, with sequences mapping to Alu elements at the locus of the *TSC2* breakpoint predicted by Illumina short-read sequencing.

**Supplementary Figure S2.** Illumina and Oxford Nanopore genome sequencing data indicating a recurrent intronic inverted duplication on chromosome 16p13 in Case 2

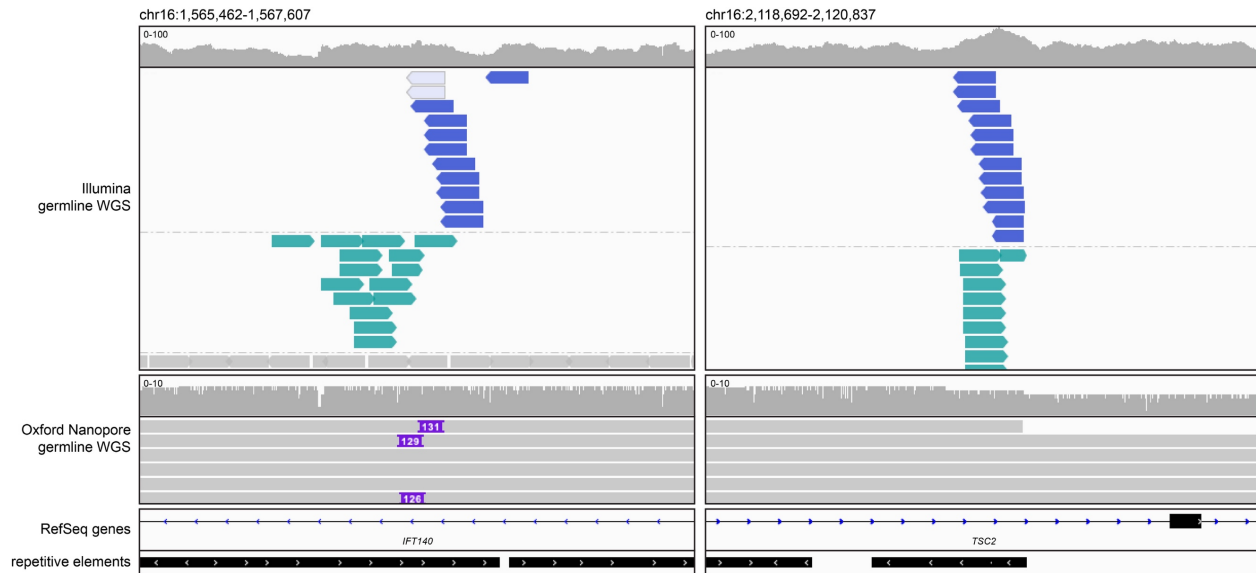

Illumina and Oxford Nanopore genome sequencing data for Case 2 visualized using IGV at the loci of *IFT140* and *TSC2*. Paired-end reads mapping to intron 30 of *IFT140* and intron 16 of *TSC2* are shown in parallel and coloured by strand. 133 bp and 136 bp insertions were found in two Nanopore reads, with sequences mapping to Alu elements at the locus of the *TSC2* breakpoint predicted by Illumina short-read sequencing.

**Supplementary Figure S3.** Illumina and Oxford Nanopore genome sequencing data indicating a recurrent intronic inverted duplication on chromosome 16p13 in Case 3

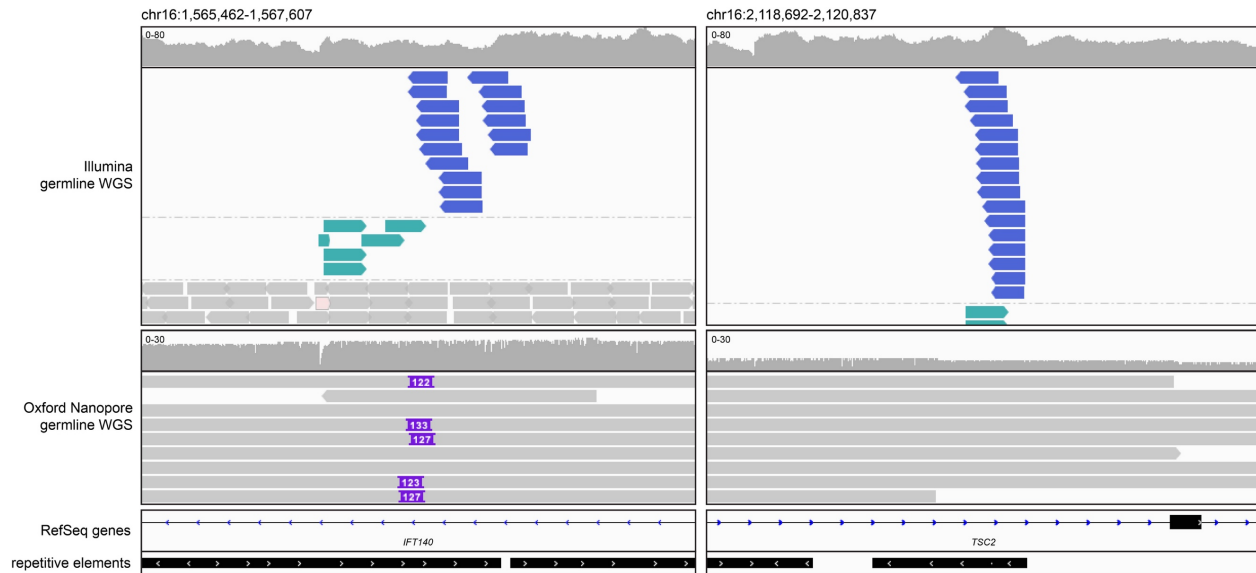

Illumina and Oxford Nanopore genome sequencing data for Case 3 visualized using IGV at the loci of *IFT140* and *TSC2*. Paired-end reads mapping to intron 30 of *IFT140* and intron 16 of *TSC2* are shown in parallel and coloured by strand. 133 bp and 136 bp insertions were found in two Nanopore reads, with sequences mapping to Alu elements at the locus of the *TSC2* breakpoint predicted by Illumina short-read sequencing.

**Supplementary Figure S4.** Illumina and Oxford Nanopore genome sequencing data supporting a likely benign complex rearrangement on chromosome 5q35

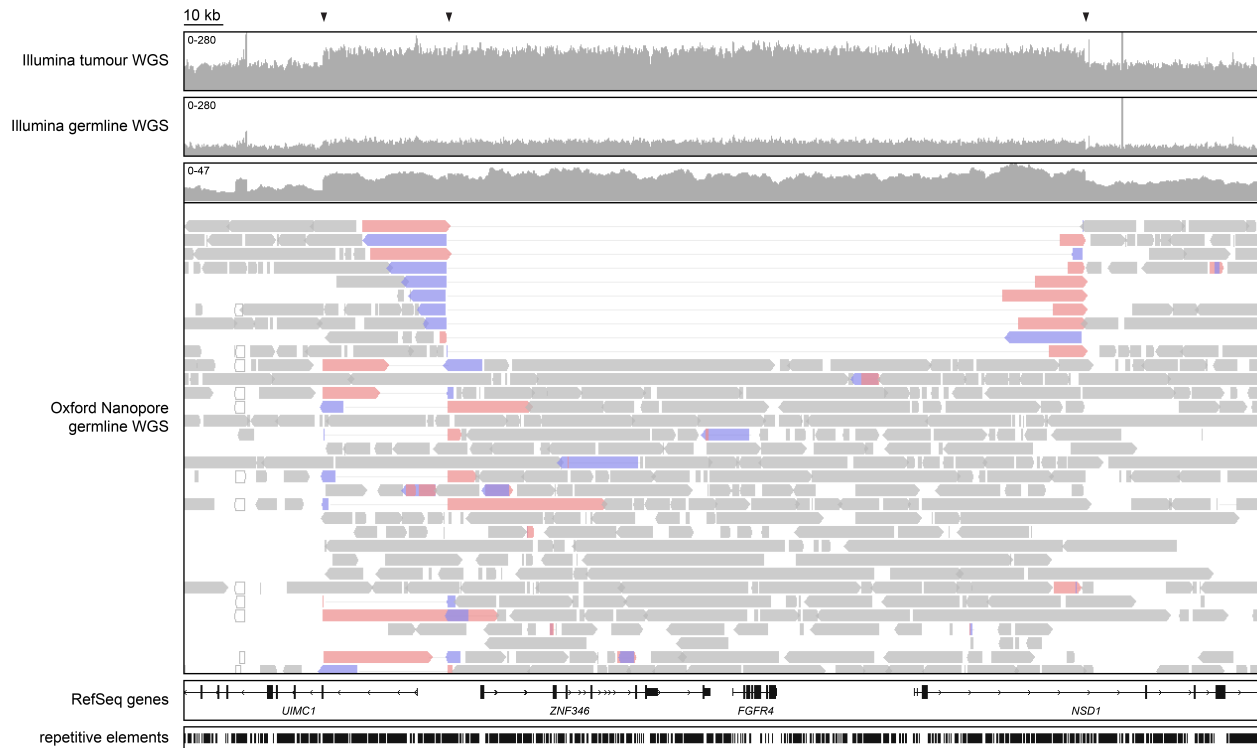

Illumina and Oxford Nanopore genome sequencing data for Case 4 visualized using IGV at the locus of *UIMC1* and *NSD1*. Split Nanopore reads spanning the breakpoint junctions are shown mapping to flanking regions of the predicted breakpoints, denoted by black arrows, and connected by a thin gray line. Read segments coloured red and blue denote split reads mapping to both plus and minus strands, indicating a probable inversion event.

**Supplementary Figure S5.** Illumina and Oxford Nanopore genome sequencing data supporting a pathogenic complex rearrangement on chromosome 16p13

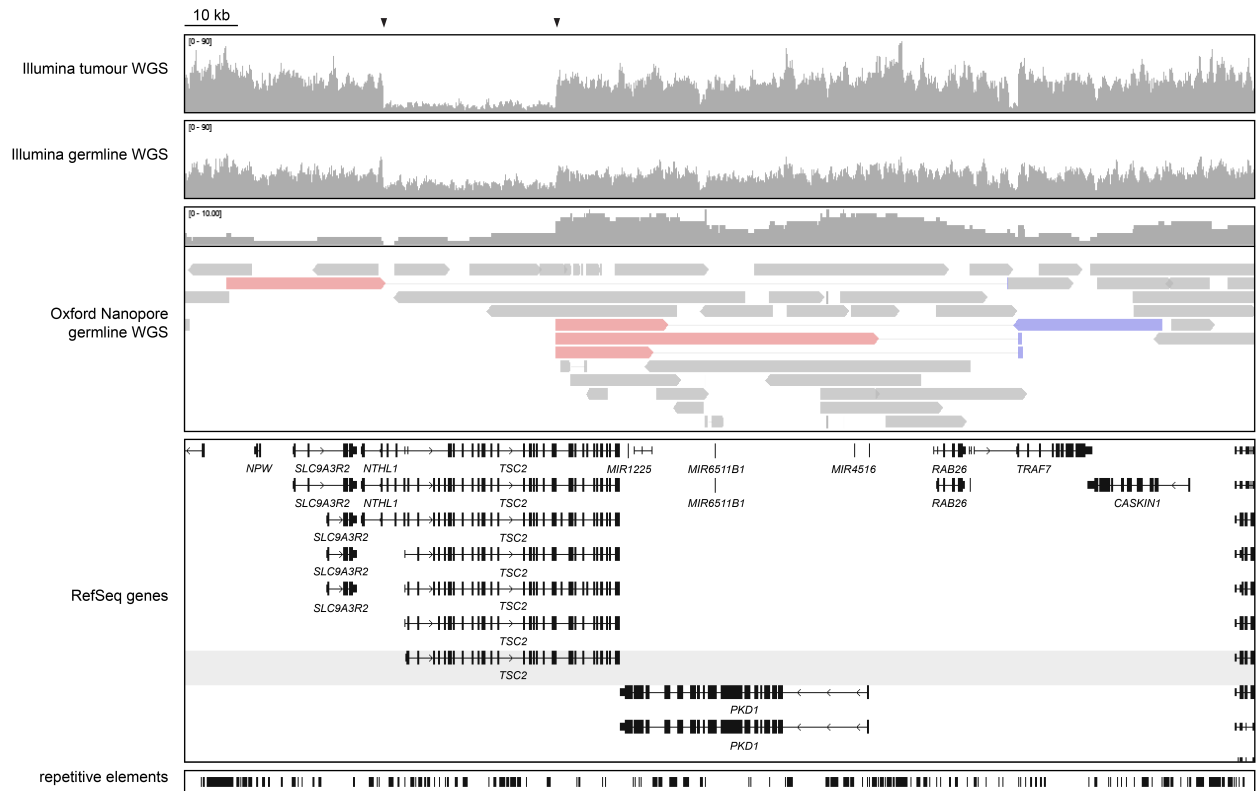

Illumina and Oxford Nanopore genome sequencing data for Case 5 visualized using IGV at the locus of *TSC2* and *NTHL1*. Split Nanopore reads spanning the breakpoint junctions are shown mapping to flanking regions of the predicted breakpoints (black arrows) connected by a thin gray line. Read segments coloured red and blue denote split reads mapping to both plus and minus strands, indicating a probable inversion event.

**Supplementary Figure S6.** Illumina and Oxford Nanopore genome sequencing data supporting a 96 kb deletion in *ATM*

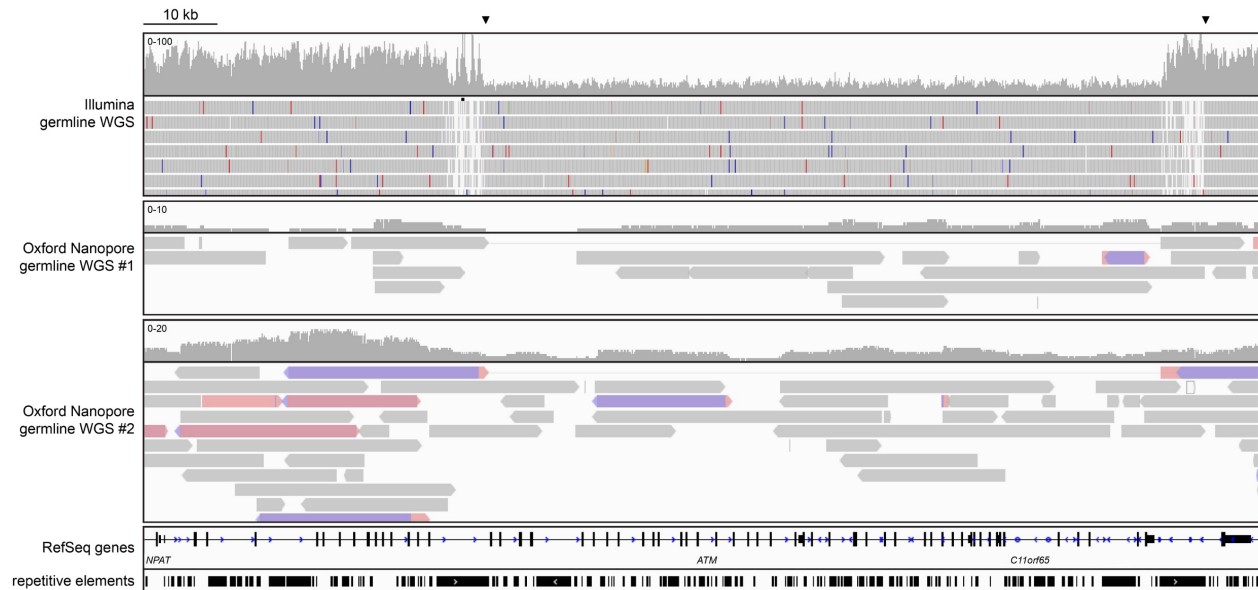

Illumina and Oxford Nanopore genome sequencing data for Case 6 visualized using IGV at the locus of *ATM*. One Nanopore read spanning the breakpoint junction from two independent sequencing runs are shown mapping to flanking regions of the predicted breakpoints (black arrows) and are connected by a thin gray line.



**Supplementary Figure S7.** Illumina and Oxford Nanopore genome sequencing data supporting a single-exon inversion in *RAD51C*

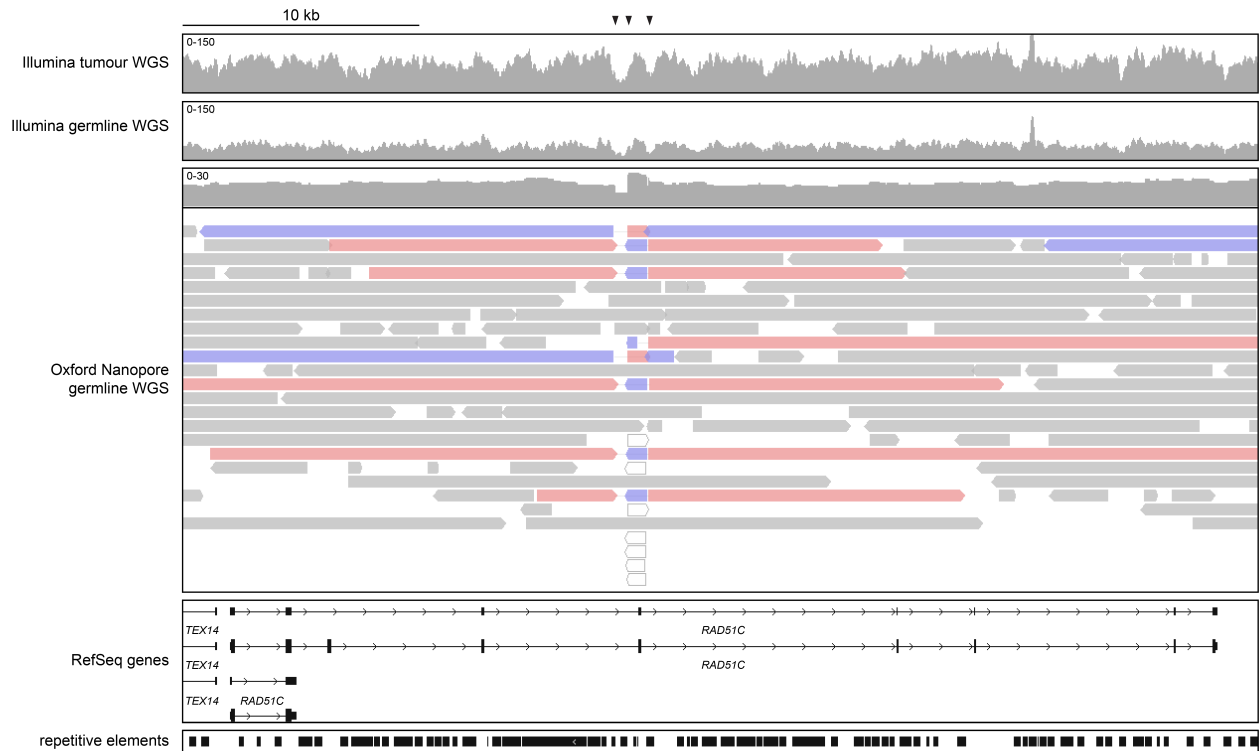

Illumina and Oxford Nanopore genome sequencing data for Case 7 visualized using IGV at the locus of *RAD51C*. Split Nanopore reads spanning the breakpoint junctions are shown mapping to flanking regions of the predicted breakpoints (black arrows) connected by a thin gray line. Read segments coloured red and blue denote split reads mapping to both plus and minus strands, indicating a probable inversion event.

**Supplementary Figure S8.** Illumina and Oxford Nanopore genome sequencing data supporting a single-exon deletion in *ATM*

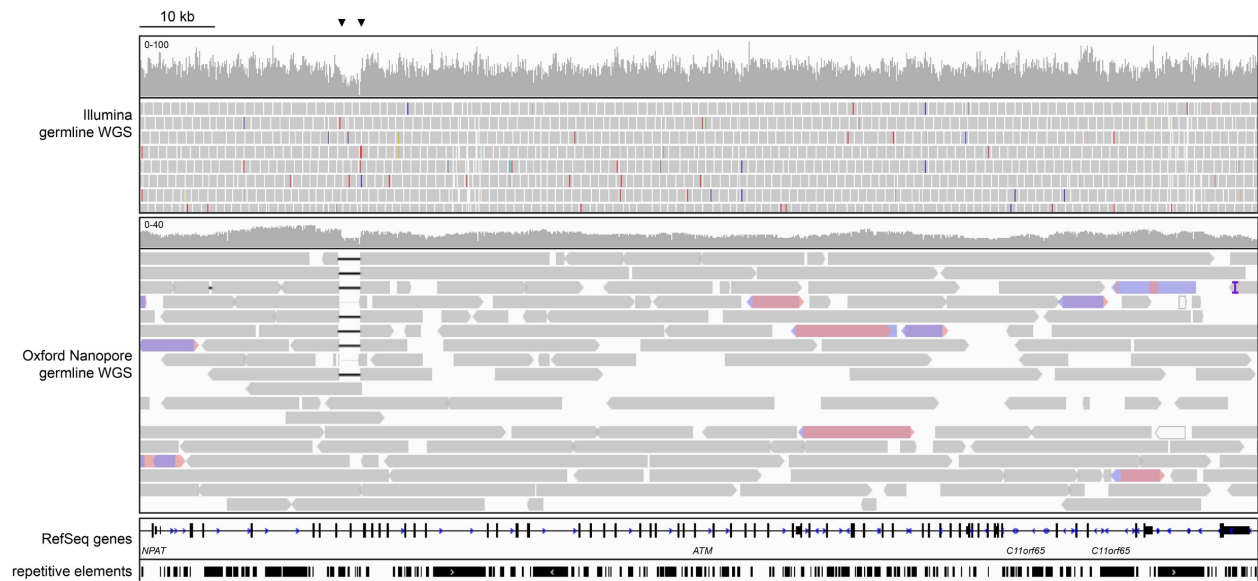

Illumina and Oxford Nanopore genome sequencing data for Case 8 visualized using IGV at the locus of *ATM*. Split Nanopore reads spanning the breakpoint junctions are shown mapping to flanking regions of the predicted breakpoints (black arrows) connected by a thin gray line.

**Supplementary Figure S9.** Illumina and Oxford Nanopore genome sequencing data supporting a 77 kb deletion with breakpoints in *BRCA1* and *NBR2*

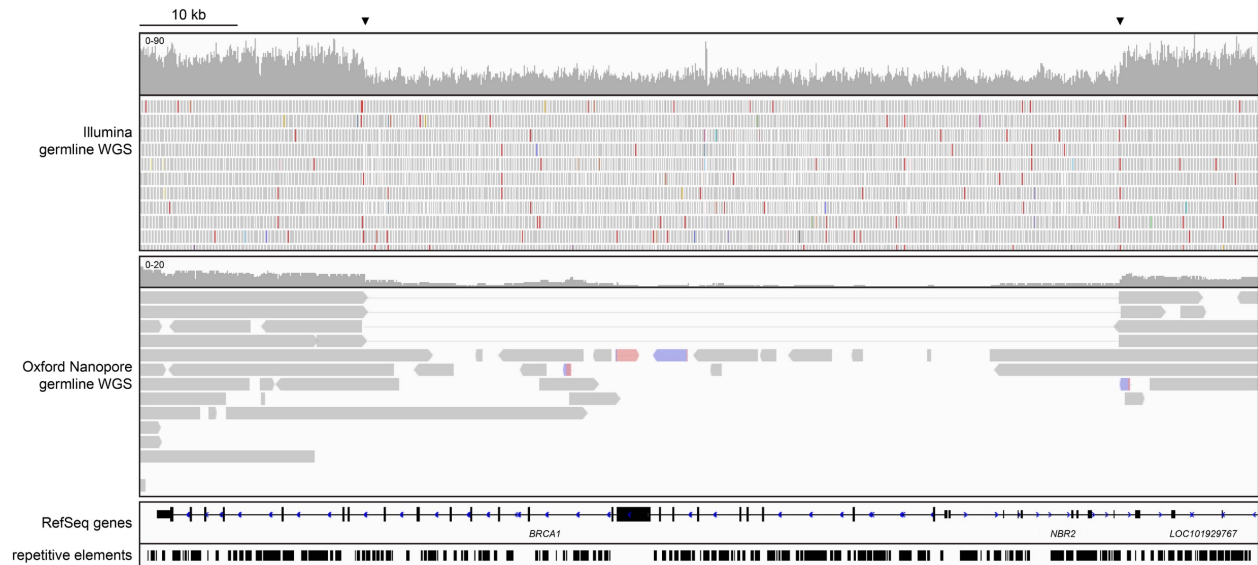

Illumina and Oxford Nanopore genome sequencing data for Case 9 visualized using IGV at the locus of *BRCA1*. Split Nanopore reads spanning the breakpoint junctions are shown mapping to flanking regions of the predicted breakpoints (black arrows) connected by a thin gray line.

**Supplementary Figure S10.** Illumina and Oxford Nanopore genome sequencing data supporting a multiexon deletion in *BRCA1*

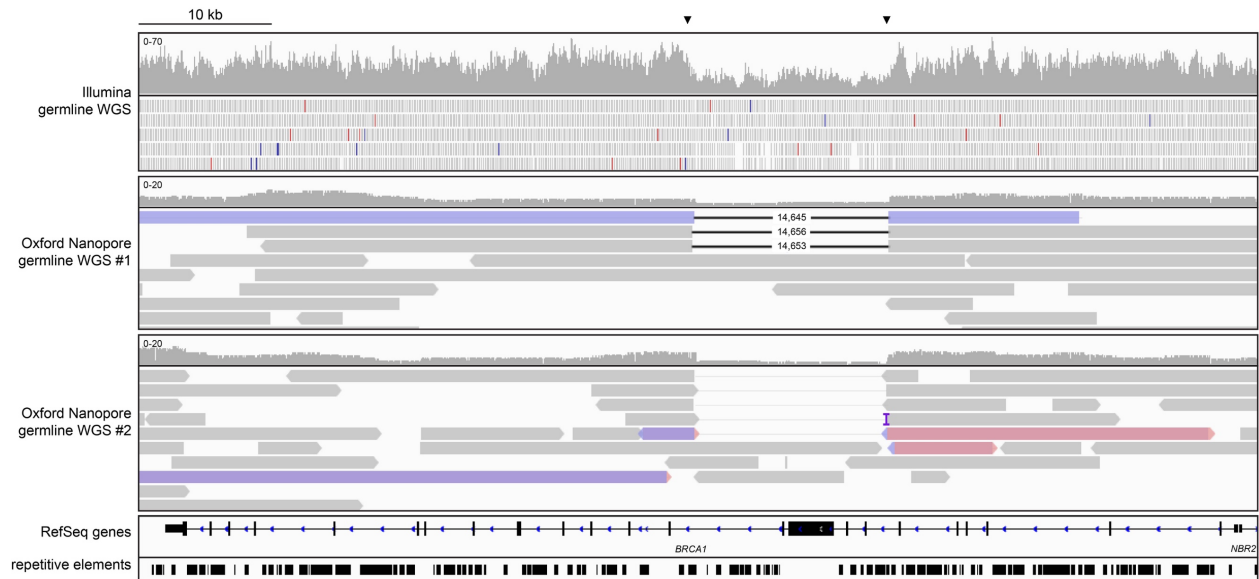

Illumina and Oxford Nanopore genome sequencing data for Case 10 visualized using IGV at the locus of *BRCA1*. Several split Nanopore reads from two PromethION sequencing runs spanning the breakpoint junctions are shown mapping to flanking regions of the predicted breakpoints (black arrows) and are connected by a thin gray line.

**Supplementary Figure S11.** Illumina and Oxford Nanopore genome sequencing data supporting a 129 kb deletion encompassing *EPCAM* and part of *MSH2*

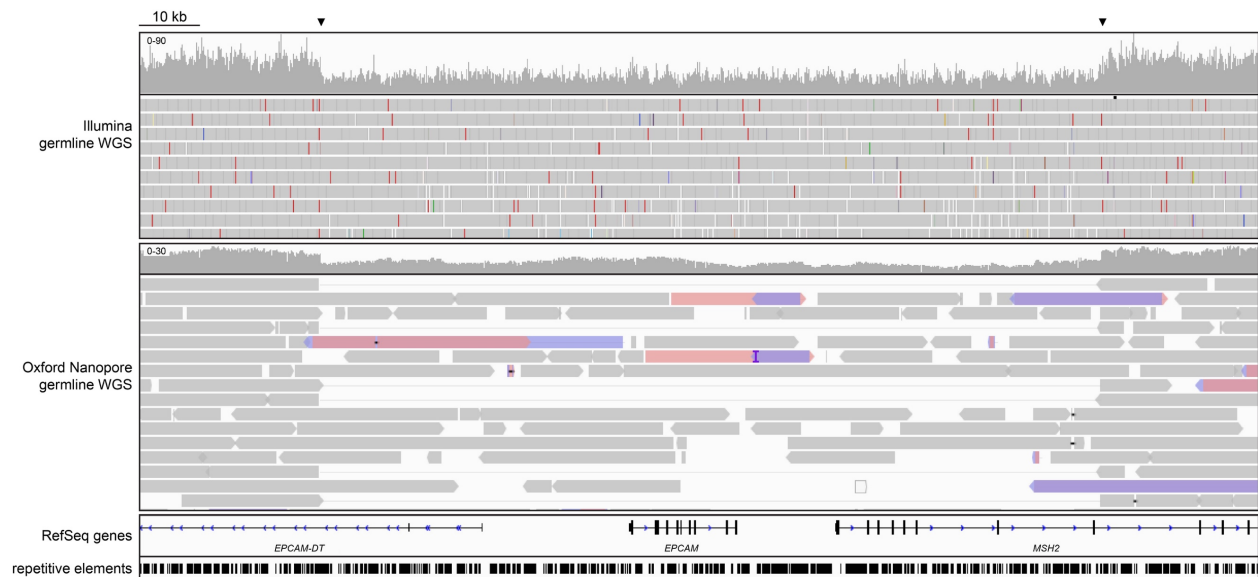

Illumina and Oxford Nanopore genome sequencing data for Case 11 visualized using IGV at the locus of *EPCAM* and *MSH2*. Split Nanopore reads spanning the breakpoint junctions are shown mapping to flanking regions of the predicted breakpoints (black arrows) connected by a thin gray line.

**Supplementary Figure S12.** Illumina and Oxford Nanopore genome sequencing data supporting a 24 kb deletion in *FANCA*

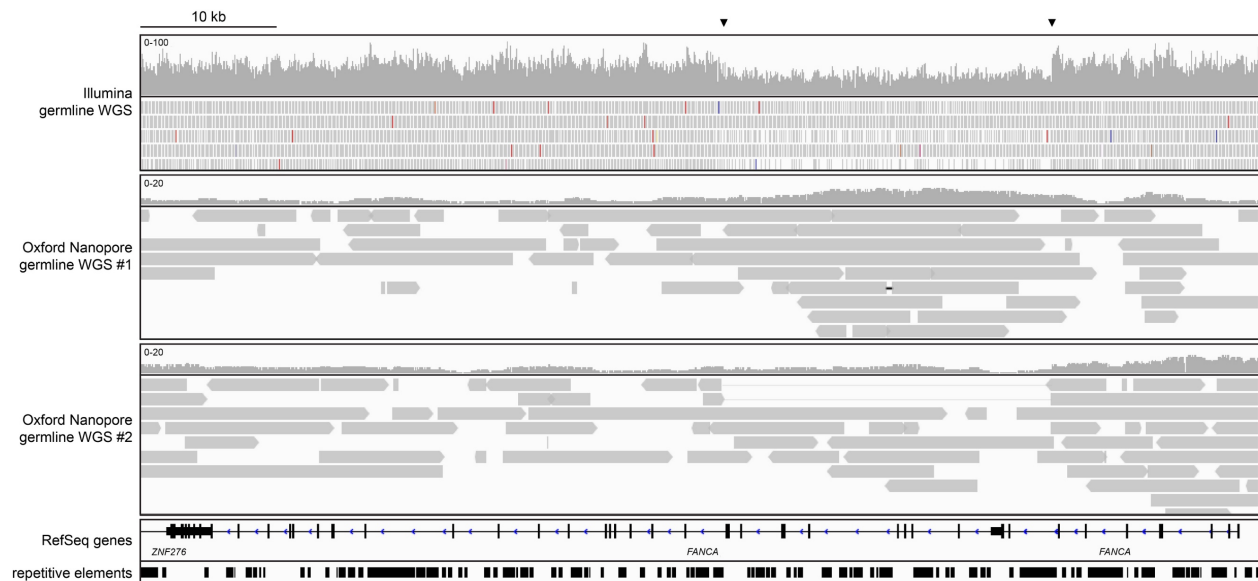

Illumina and Oxford Nanopore genome sequencing data for Case 12 visualized using IGV at the locus of *FANCA*. Split Nanopore reads spanning the breakpoint junction were identified in only one of two independent PromethION sequencing runs and are shown mapping to flanking regions of the predicted breakpoints (black arrows).

**Supplementary Figure S13.** Illumina and Oxford Nanopore genome sequencing data supporting a 3.4 kb deletion in *PALB2*

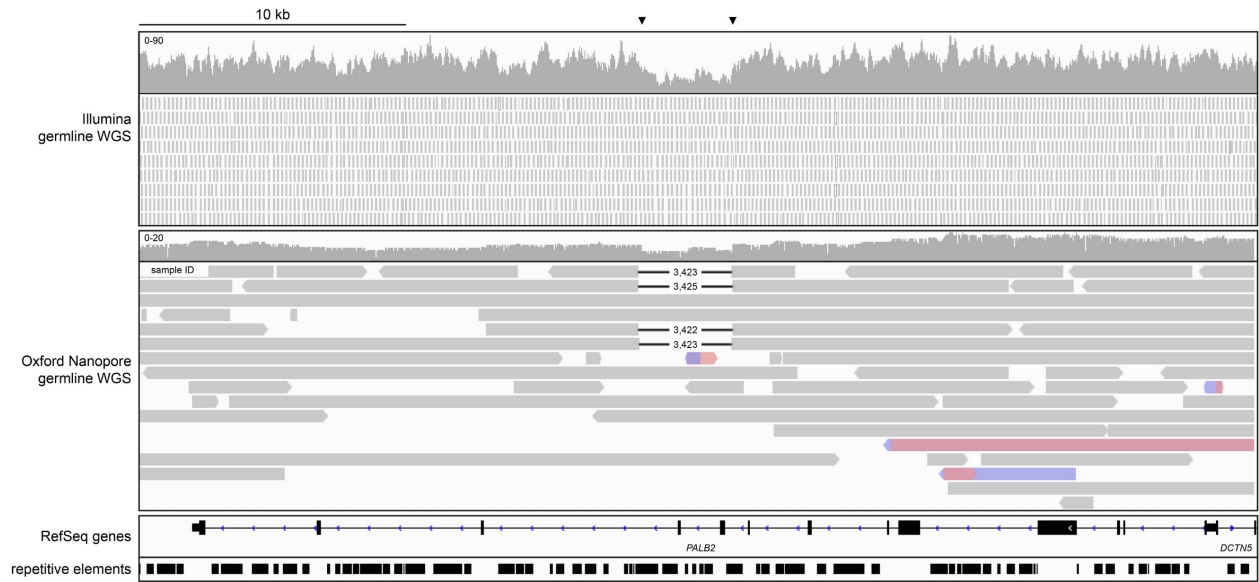

Illumina and Oxford Nanopore genome sequencing data for Case 13 visualized using IGV at the locus of *PALB2*. Split Nanopore reads spanning the breakpoint junction are shown mapping to flanking regions of the predicted breakpoints (black arrows).

**Supplementary Figure S14.** Illumina genome sequencing data supporting a clinically-confirmed multiexon deletion in *TP53*

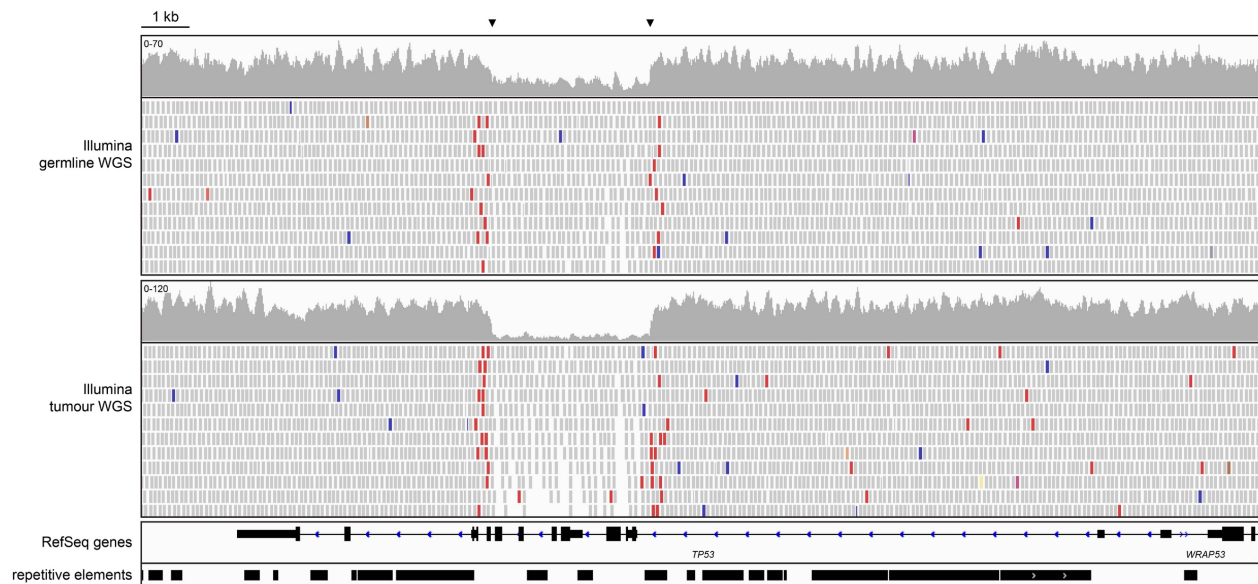

Germline and tumour Illumina short-read genome sequencing data in Case 14 for a clinically-validated germline deletion in *TP53* but for whom germline DNA was insufficient for long-read sequencing. Breakpoints characterized by Illumina genome sequencing are denoted by black arrows, and deletions are observed by a decrease in read coverage highlighted by blue shaded boxes.



**Supplementary Figure S15.** Contribution of characterized somatic SNV signatures to tumorigenesis in cases with known genetic associations

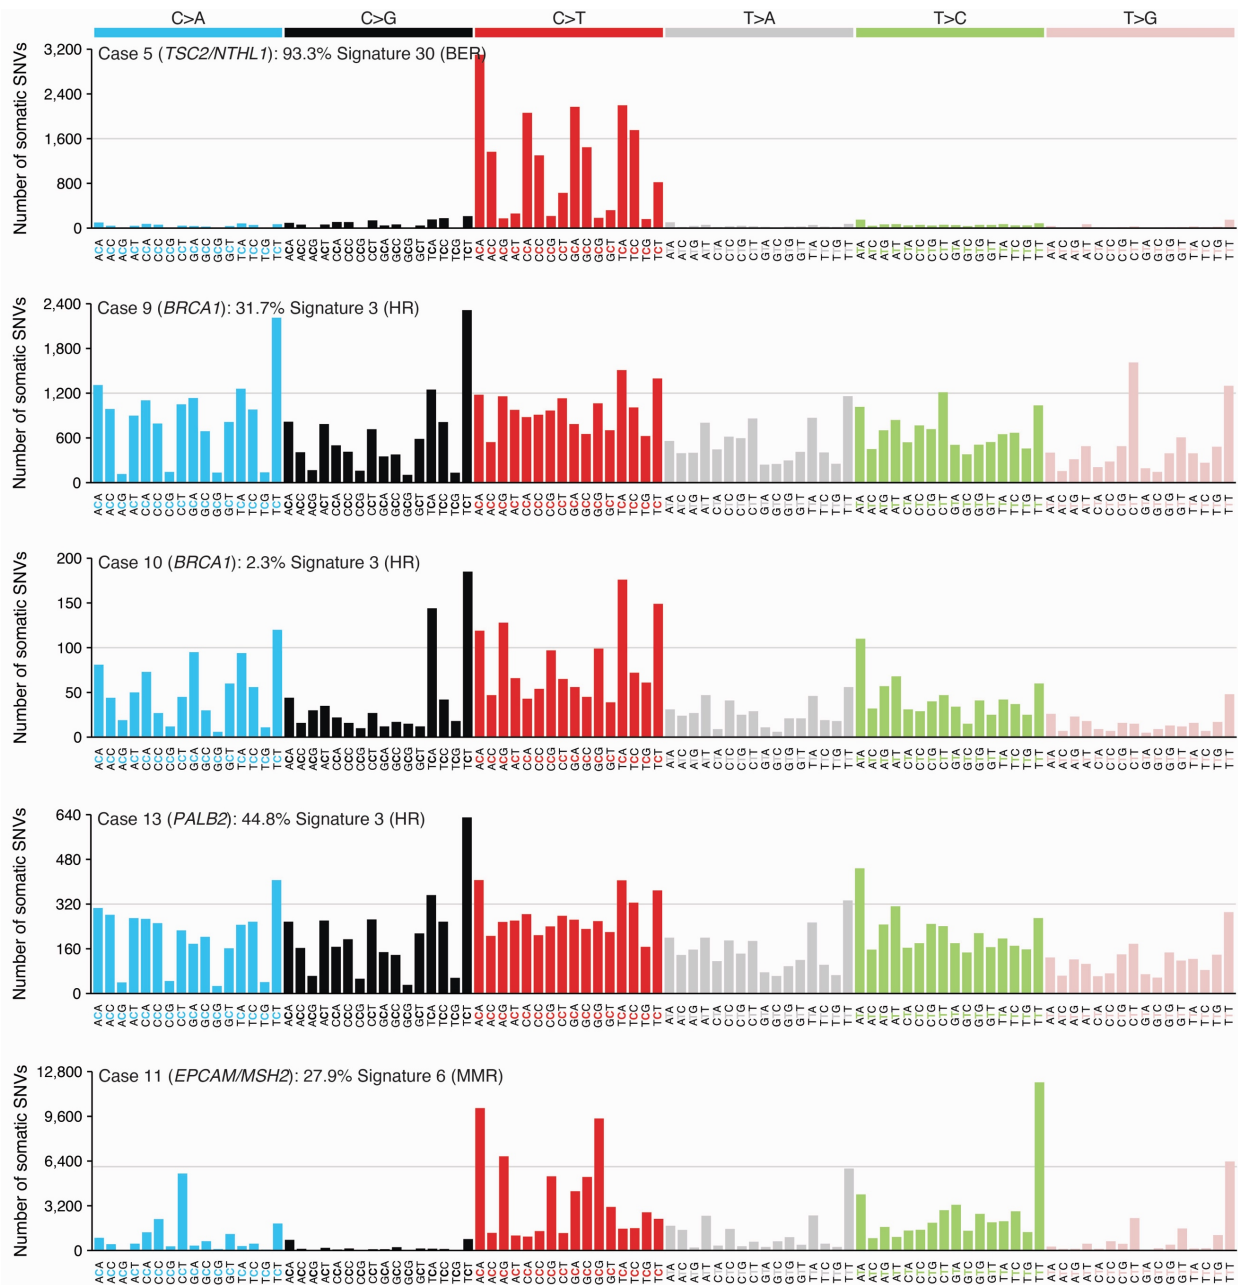

Somatic SNV signatures were characterized in tumours from carriers of pathogenic germline structural variants. The number of somatic SNVs in each of 96 possible trinucleotide contexts is shown for cases with known associations according to the Catalog of Somatic Mutations in Cancer (COSMIC) version 2, and the percent contribution of relevant signatures to global somatic single nucleotide variation is noted. BER, base excision repair; HR, homologous recombination; MMR, mismatch repair.

**Supplementary Table S1.** Cancer predisposition genes assessed for pathogenic and likely pathogenic germline variants as part of the POG program

| Gene Symbol        | Entrez ID | OMIM ID | Inheritance | Locus          |
|--------------------|-----------|---------|-------------|----------------|
| ABRAXAS1 (FAM175A) | 84142     | 611143  | AD          | 4q21.23        |
| AKT1               | 207       | 164730  | SM          | 14q32.33       |
| ALK                | 238       | 105590  | AD          | 2p23.2         |
| APC                | 324       | 611731  | AD          | 5q21-q22       |
| ATM                | 472       | 607585  | CX          | 11q22.3        |
| ATR                | 545       | 601215  | AR          | 3q22-q24       |
| AXIN2              | 8313      | 604025  | AD          | 17q24          |
| BAP1               | 8314      | 603089  | AD          | 3p21.1         |
| BARD1              | 580       | 601593  | AD          | 2q34-q35       |
| BLM                | 641       | 604610  | AR          | 15q26.1        |
| BMPR1A             | 657       | 601299  | AD          | 10q22.3        |
| BRCA1              | 672       | 113705  | AD          | 17q21          |
| BRCA2              | 675       | 600185  | CX          | 13q12.3        |
| BRIP1              | 83990     | 605882  | AD          | 17q22          |
| CBL                | 867       | 165360  | AD          | 11q23.3        |
| CDC73              | 79577     | 607393  | AD          | 1q25-q31       |
| CDH1               | 999       | 192090  | AD          | 16q22.1        |
| CDK4               | 1019      | 123829  | AD          | 12q14          |
| CDKN1B             | 1027      | 600778  | AD          | 12p13          |
| CDKN2A             | 1029      | 600160  | AD          | 9p21           |
| CHEK2              | 11200     | 604373  | AD          | 22q12.1        |
| DICER1             | 23405     | 606241  | AD          | 14q32.13       |
| DKC1               | 1736      | 305000  | XLR         | Xq28           |
| EGFR               | 1956      | 131550  | AD          | 7p11.2         |
| EPCAM              | 4072      | 185535  | CX          | 2p21           |
| ERCC2              | 2068      | 126340  | AR          | 19q13.2-q13.3  |
| ERCC3              | 2071      | 133510  | AR          | 2q21           |
| ERCC4              | 2072      | 133520  | AR          | 16p13.3-p13.13 |
| ERCC5              | 2073      | 133530  | AR          | 13q33          |
| ETV6               | 2120      | 616216  | AD          | 12p13.2        |
| EZH2               | 2146      | 601573  | AD          | 7q36.1         |
| FANCA              | 2175      | 607139  | AR          | 16q24.3        |
| FANCC              | 2176      | 613899  | AR          | 9q22.3         |
| FH                 | 2271      | 136850  | CX          | 1q42.1         |
| FLCN               | 201163    | 607273  | AD          | 17p11.2        |

|         |       |        |    |              |
|---------|-------|--------|----|--------------|
| GATA2   | 2624  | 137295 | AD | 3q21.3       |
| GREM1   | 26585 | 603054 | AD | 15q13.3      |
| HNF1A   | 6927  | 142410 | AD | 12q24.31     |
| HRAS    | 3265  | 190020 | AD | 11p15.5      |
| IDH1    | 3417  | 147700 | SM | 2q34         |
| KIT     | 3815  | 164920 | AD | 4q12         |
| MAX     | 4149  | 154950 | AD | 14q23.3      |
| MEN1    | 4221  | 613733 | AD | 11q13.1      |
| MET     | 4233  | 164860 | AD | 7q31.2       |
| MITF    | 4286  | 156845 | AD | 3p14-p13     |
| MLH1    | 4292  | 120436 | AD | 3p22.2       |
| MRE11   | 4361  | 600814 | CX | 11q21        |
| MSH2    | 4436  | 609309 | AD | 2p21         |
| MSH6    | 2956  | 600678 | AD | 2p16.3       |
| MUTYH   | 4595  | 604933 | AR | 1p34.1       |
| NBN     | 4683  | 602667 | CX | 8q21.3       |
| NF1     | 4763  | 613113 | AD | 17q11.2      |
| NF2     | 4771  | 607379 | AD | 22q12.2      |
| NSD1    | 64324 | 606681 | AD | 5q35.2-q35.3 |
| PALB2   | 79728 | 610355 | CX | 16p12.2      |
| PAX5    | 5079  | 167414 | AD | 9p13.2       |
| PDGFRA  | 5156  | 173490 | AD | 4q12         |
| PHOX2B  | 8929  | 603851 | AD | 4p13         |
| PIK3CA  | 5290  | 171834 | SM | 3q26.32      |
| PMS1    | 5378  | 600258 | AD | 2q31-q33     |
| PMS2    | 5395  | 600259 | AD | 7p22.1       |
| POLD1   | 5424  | 612591 | AD | 19q13.33     |
| POLE    | 5426  | 174762 | AD | 12q24.33     |
| PRKAR1A | 5573  | 188830 | AD | 17q24.2      |
| PTCH1   | 5727  | 601309 | AD | 9q22.32      |
| PTEN    | 5728  | 601728 | AD | 10q23.31     |
| PTPN11  | 5781  | 176876 | AD | 12q24.13     |
| RAD50   | 10111 | 604040 | CX | 5q31.1       |
| RAD51   | 5888  | 179617 | AD | 15q15.1      |
| RAD51B  | 5890  | 602948 | AD | 14q24.1      |
| RAD51C  | 5889  | 602774 | AD | 17q22        |
| RAD51D  | 5892  | 602954 | AD | 17q12        |
| RB1     | 5925  | 614041 | AD | 13q14.2      |

|         |       |        |    |          |
|---------|-------|--------|----|----------|
| RECQL4  | 9401  | 603780 | CX | 8q24.3   |
| RET     | 5979  | 164761 | AD | 10q11.21 |
| RUNX1   | 861   | 151385 | AD | 21q22.12 |
| SDHA    | 6389  | 600857 | CX | 5p15.33  |
| SDHAF2  | 54949 | 613019 | AD | 11q12.2  |
| SDHB    | 6390  | 185470 | AD | 1p36.13  |
| SDHC    | 6391  | 602413 | AD | 1q23.3   |
| SDHD    | 6392  | 602690 | AD | 11q23.1  |
| SH2D1A  | 4068  | 300490 | XR | Xq25     |
| SMAD4   | 4089  | 600993 | AD | 18q21.2  |
| SMARCA4 | 6597  | 603254 | AD | 19p13.2  |
| SMARCB1 | 6598  | 601607 | AD | 22q11.23 |
| STK11   | 6794  | 602216 | AD | 19p13.3  |
| SUFU    | 51684 | 607035 | AD | 10q24.32 |
| TERC    | 7012  | 127550 | AD | 3q26.2   |
| TERT    | 7015  | 187270 | AD | 5p15.33  |
| TGFBR1  | 7046  | 190181 | AD | 9q22.33  |
| TINF2   | 26277 | 613990 | AD | 14q12    |
| TMEM127 | 55654 | 613403 | AD | 2q11.2   |
| TP53    | 7157  | 191170 | AD | 17p13.1  |
| TSC1    | 7248  | 605284 | AD | 9q34.13  |
| TSC2    | 7249  | 191092 | AD | 16p13.3  |
| VHL     | 7428  | 608537 | CX | 3p25.3   |
| WRN     | 7486  | 277700 | AR | 8p12     |
| WT1     | 7490  | 607102 | CX | 11p13    |

**Supplementary Table S2.** Illumina and Oxford Nanopore genome sequencing and variant calling information for candidate germline structural variants

| Illumina WGS variant calling |            |               |               |      |                             | Oxford Nanopore variant information |                          |                |            |               |      |
|------------------------------|------------|---------------|---------------|------|-----------------------------|-------------------------------------|--------------------------|----------------|------------|---------------|------|
| ID                           | Chromosome | 5' breakpoint | 3' breakpoint | Type | Call method                 | 5' breakpoint                       | 3' breakpoint            | Type (subtype) | Length     | Variant reads | Runs |
| 1                            | 16p13      | 1,566,535     | 2,119,866     | INV  | custom script               | 1,566,516                           | 1,566,651                | INS (AL)       | 131 bp     | 7             | 1    |
| 2                            | 16p13      | 1,566,535     | 2,119,866     | INV  | DELLY, Manta                | 1,566,507                           | 1,566,633                | INS (AL)       | 129 bp     | 3             | 1    |
| 3                            | 16p13      | 1,566,535     | 2,119,866     | INV  | DELLY, Manta                | 1,566,499                           | 1,566,631                | INS (AL)       | 132 bp     | 10            | 1    |
| 4                            | 5q35       | 176,441,543   | 176,603,468   | INV  | DELLY, Manta, Trans-ABYSS   | 176,441,543                         | 176,603,468              | INV (SR)       | 161,925 bp | 10            | 2    |
|                              |            |               |               |      |                             | 176,409,771 <sup>a</sup>            | 176,441,549 <sup>a</sup> | INV (SR)       | 31,778 bp  | 15            | 2    |
| 5 <sup>b</sup>               | 16p13      | 2,126,780     | 2,214,187     | INV  | DELLY, Manta                | 2,126,780                           | 2,214,187                | INV (SR)       | 87,407 bp  | 1             | 2    |
|                              |            |               |               |      |                             | 2,093,920                           | 2,212,350                | INV (SR)       | 118,430 bp | 3             | 2    |
| 6                            | 11q22      | 108,137,586   | 108,227,717   | DEL  | Control-FREEC               | 108,137,370                         | 108,233,694              | DEL (SR)       | 96,324 bp  | 2             | 2    |
| 7                            | 17q22      | 56,786,751    | 56,787,647    | INV  | Manta                       | 56,786,207                          | 56,786,758 <sup>c</sup>  | DEL (SR)       | 551 bp     | 5             | 2    |
|                              |            |               |               |      |                             | 56,786,751                          | 56,787,655 <sup>c</sup>  | INV (SR)       | 904 bp     | 8             | 2    |
| 8                            | 11q22      | 108,118,496   | 108,121,054   | DEL  | DELLY, Manta                | 108,118,507                         | 108,121,041              | DEL (AL, SR)   | 2,534 bp   | 9             | 1    |
| 9                            | 17q21      | 41,217,614    | 41,295,110    | DEL  | Control-FREEC, DELLY, Manta | 41,217,612                          | 41,295,114               | DEL (SR)       | 77,502 bp  | 4             | 1    |
| 10                           | 17q21      | 41,235,786    | 41,250,846    | DEL  | Control-FREEC               | 41,236,461                          | 41,250,954               | DEL (AL, SR)   | 14,493 bp  | 8             | 2    |
| 11                           | 2p21       | 47,545,553    | 47,674,137    | DEL  | Control-FREEC, DELLY, Manta | 47,545,553                          | 47,673,900               | DEL (SR)       | 128,347 bp | 8             | 1    |

**Supplementary Table S2.** Illumina and Oxford Nanopore genome sequencing and variant calling information for candidate germline structural variants (continued from previous page)

|                                                                                                                                                                                                                                                                                                                                                                                                                                              |       |            |            |     |                                          |            |            |          |           |    |    |
|----------------------------------------------------------------------------------------------------------------------------------------------------------------------------------------------------------------------------------------------------------------------------------------------------------------------------------------------------------------------------------------------------------------------------------------------|-------|------------|------------|-----|------------------------------------------|------------|------------|----------|-----------|----|----|
| 12                                                                                                                                                                                                                                                                                                                                                                                                                                           | 16q24 | 89,844,986 | 89,869,214 | DEL | Control-FREEC, DELLY, Manta, Trans-ABYSS | 89,844,987 | 89869211   | DEL (SR) | 24,224 bp | 4  | 2  |
| 13                                                                                                                                                                                                                                                                                                                                                                                                                                           | 16p12 | 23,631,306 | 23,634,733 | DEL | DELLY, Manta                             | 23,631,313 | 23,634,736 | DEL (AL) | 3,423 bp  | 4  | 1  |
| 14                                                                                                                                                                                                                                                                                                                                                                                                                                           | 17p13 | 7,576,941  | 7,580,192  | DEL | DELLY, Manta, Trans-ABYSS                | NA         | NA         | NA       | NA        | NA | NA |
| <p><sup>a</sup>Breakpoints resolved through manual curation: 176,409,841-176,441,555 (31,714 bp)<br/> <sup>b</sup>Case 5 was sequenced only on the Oxford Nanopore MinION<br/> <sup>c</sup>Breakpoints resolved through manual curation: 56,786,207-56,786,751 (544 bp)<br/> <sup>d</sup>Breakpoints resolved through manual curation: 56,786,751-56,787,647 (896 bp)<br/> AL, alignment; DEL, deletion; INS, insertion; SR, split reads</p> |       |            |            |     |                                          |            |            |          |           |    |    |

**Supplementary Table S3.** Illumina tumour genome and transcriptome sequencing for known and putative carriers of pathogenic and likely pathogenic germline structural variants

| Case ID | Tumour genome sequencing |                |                           |                      | Tumour RNA-seq         |              |                                       |
|---------|--------------------------|----------------|---------------------------|----------------------|------------------------|--------------|---------------------------------------|
|         | Average depth            | Tumour content | SV calling tools          | Best evidence        | Copy change and/or LOH | Mapped reads | mRNA impact (read support)            |
| Case 1  | 83X                      | 32%            | custom script             | targeted realignment | none                   | 210M         | NA                                    |
| Case 2  | 86X                      | 58%            | DELLY, Manta              | flanking reads       | none                   | 208M         | NA                                    |
| Case 3  | 98X                      | 36%            | NS                        | NS                   | deletion LOH           | 408M         | NA                                    |
| Case 4  | 92X                      | 24%            | DELLY, Manta, Trans-ABySS | contig               | amplification          | 225M         | NSD1-UIMC1 (41X)<br>UIMC1-ZNF346 (5X) |
| Case 5  | 89X                      | 77%            | DELLY, Manta              | contig               | deletion LOH           | 290M         | TRAF7-NTHL1 (97X)                     |
| Case 6  | 85X                      | 50%            | NA                        | NA                   | deletion LOH           | 214M         | E17-E61 skipping (27X)                |
| Case 7  | 81X                      | 65%            | DELLY                     | split reads          | none                   | 231M         | E5 skipping (57X)                     |
| Case 8  | 102X                     | 60%            | DELLY, Manta              | contig               | none                   | 349M         | E9 skipping (NS)                      |
| Case 9  | 114X                     | 49%            | DELLY, Manta              | contig               | neutral LOH            | 210M         | NA                                    |
| Case 10 | 80X                      | 80%            | NA                        | NA                   | none                   | 179M         | E8-E11 skipping (20X)                 |
| Case 11 | 82X                      | 43%            | DELLY, Manta              | contig               | neutral LOH            | 200M         | NA                                    |
| Case 12 | 103X                     | 41%            | DELLY, Manta, Trans-ABySS | contig               | deletion LOH           | 388M         | E9-E20 skipping (NS)                  |
| Case 13 | 102X                     | 70%            | DELLY, Manta              | contig               | neutral LOH            | 335M         | E9-E10 skipping (25X)                 |
| Case 14 | 87X                      | 60%            | DELLY, Manta, Trans-ABySS | contig               | neutral LOH            | 385M         | E2-E9 skipping (277X)                 |

E, exon; LOH, loss of heterozygosity; NA, not applicable; NS, not supported

**Supplementary Table S4.** Repetitive elements and sequence similarity at breakpoint junctions

| Case ID          | 5' breakpoint  |                     |                 | 3' breakpoint  |                                        |                 | Breakpoint sequence analysis ( $\pm 150$ bp) |       |     |                   |
|------------------|----------------|---------------------|-----------------|----------------|----------------------------------------|-----------------|----------------------------------------------|-------|-----|-------------------|
|                  | Position       | Repeat name (class) | Length (strand) | Position       | Repeat name (class)                    | Length (strand) | Identity                                     | Gaps  | MH  | Junction features |
| Cases 1, 2 and 3 | 16:1,566,535   | AluY (SINE)         | 303 bp (+)      | 16: 2,119,755  | AluY (SINE)                            | 295 bp (-)      | 65.8%                                        | 15.4% |     | unknown           |
|                  |                |                     |                 | 16: 2,119,836  | AluSx (SINE)                           | 133 bp (-)      | 61.3%                                        | 26.6% |     | unknown           |
| Case 4           | 5:176,441,543  | NA                  | NA              | 5:176,603,468  | AluJo (SINE)                           | 167 bp (-)      | 39.9%                                        | 31.5% | yes | indel             |
|                  | 5:176,409,841  | AluSx (SINE)        | 286 bp (-)      | 5:176,441,555  | NA                                     | NA              | 50.7%                                        | 22.0% | yes | indel             |
| Case 5           | 16:2,126,780   | NA                  | NA              | 16:2,214,187   | (CGTG) <sub>n</sub><br>(Simple repeat) | 55 bp (+)       | 44.6%                                        | 28.6% |     | indel             |
|                  | 16:2,093,920   | NA                  | NA              | 16:2,212,350   | NA                                     | NA              | 48.5%                                        | 23.5% |     | blunt ends        |
| Case 6           | 11:108,137,370 | L1PA2 (LINE)        | 6,017 bp (+)    | 11:108,233,694 | L1PA2 (LINE)                           | 6,036 bp (+)    | 41.3%                                        | 31.5% |     | unknown           |
| Case 7           | 17:56,786,207  | AluSx3              | 112 bp (-)      | 17:56,786,751  | NA                                     | NA              | 55.1%                                        | 38.2% | yes | unknown           |
|                  | 17:56,786,751  | NA                  | NA              | 17:56,787,647  | AluSg (SINE)                           | 316 bp (+)      | 40.9%                                        | 50.4% | yes | unknown           |
| Case 8           | 11:108,118,496 | AluSg (SINE)        | 306 bp (-)      | 11:108,121,054 | AluSg (SINE)                           | 257 bp (-)      | 74.4%                                        | 8.3%  |     | blunt ends        |
| Case 9           | 17:41,217,614  | AluSp (SINE)        | 308 bp (+)      | 17:41,295,110  | (TTTA) <sub>n</sub><br>(Simple repeat) | 23 bp (+)       | 32.0%                                        | 41.3% |     | blunt ends        |
| Case 10          | 17:41,235,786  | NA                  | NA              | 17:41,250,846  | AluSp (SINE)                           | 302 bp (-)      | 39.9%                                        | 31.5% |     | unknown           |
| Case 11          | 2:47,545,553   | AluSp (SINE)        | 284 bp (-)      | 2:47,674,137   | AluSq2 (SINE)                          | 296 bp (-)      | 56.3%                                        | 24.0% | yes | blunt ends        |



**Supplementary Table S4.** Repetitive elements and sequence similarity at breakpoint junctions (continued from previous page)

|         |               |               |            |               |               |            |       |       |            |
|---------|---------------|---------------|------------|---------------|---------------|------------|-------|-------|------------|
| Case 12 | 16:89,844,986 | AluSg (SINE)  | 164 bp (+) | 16:89,869,214 | L1MA5 (LINE)  | 474 bp (+) | 32.6% | 60.1% | blunt ends |
| Case 13 | 16:23,631,306 | AluSz6 (SINE) | 292 bp (-) | 16:23,634,733 | AluSx3 (SINE) | 301 bp (-) | 77.6% | 5.2%  | indel      |
| Case 14 | 17:7,576,941  | NA            | NA         | 17:7,580,192  | L2 (LINE)     | 179 bp (+) | 43.2% | 29.5% | blunt ends |

**Supplementary Table S5.** Personal and family cancer history in individuals with known or candidate germline structural variants

| Case ID | Personal cancer history (age at diagnosis)                                                                     | Family cancer history (relative, age at diagnosis)                                                                                                                                                                                                 | Clinical phenotype                                                                             | Genetic diagnosis                    |
|---------|----------------------------------------------------------------------------------------------------------------|----------------------------------------------------------------------------------------------------------------------------------------------------------------------------------------------------------------------------------------------------|------------------------------------------------------------------------------------------------|--------------------------------------|
| Case 1  | non-small cell lung cancer (67)                                                                                | none                                                                                                                                                                                                                                               | none                                                                                           | none                                 |
| Case 2  | multifocal rectal and sigmoid (45)<br>gastrointestinal stromal tumour (45)<br>retroperitoneal liposarcoma (45) | uterine (mother, 50s)<br>lung (maternal grandfather)<br>colon (father, 60s)                                                                                                                                                                        | multiple primary cancers                                                                       | none                                 |
| Case 3  | pancreatic neuroendocrine tumour (48)                                                                          | bone (father, 69)<br>brain (paternal aunt, 77)                                                                                                                                                                                                     | none                                                                                           | none                                 |
| Case 4  | cholangiocarcinoma (59)                                                                                        | pancreas (mother, 50s)                                                                                                                                                                                                                             | none                                                                                           | none                                 |
| Case 5  | malignant angiomyolipoma (40)<br>pancreatic neuroendocrine tumour (46)                                         | none                                                                                                                                                                                                                                               | tuberous sclerosis complex                                                                     | <i>TSC2</i> and <i>NTHL1</i> carrier |
| Case 6  | cholangiocarcinoma (33)                                                                                        | not reported                                                                                                                                                                                                                                       | none                                                                                           | <i>ATM</i>                           |
| Case 7  | solitary fibrous tumour (44)                                                                                   | breast (sister, 50s)<br>multiple myeloma (father, 86)<br>blood (paternal grandmother, unknown)<br>brain (maternal uncle, unknown)                                                                                                                  | none                                                                                           | <i>RAD51C</i>                        |
| Case 8  | pancreatic ductal adenocarcinoma (53)                                                                          | esophageal (father, 61)<br>stomach (paternal aunt, 63)<br>breast (paternal cousin, 53)                                                                                                                                                             | none (referral for universal pancreatic screening)                                             | <i>ATM</i>                           |
| Case 9  | esophageal (73)                                                                                                | none                                                                                                                                                                                                                                               | none                                                                                           | <i>BRCA1</i>                         |
| Case 10 | Ewing's sarcoma (27)                                                                                           | ovarian (mother, 45)<br>lung (maternal grandfather, 52)<br>breast (maternal great aunt, 50)<br>ovarian (maternal great aunt, 48)                                                                                                                   | referral for carrier testing for HBOC <sup>a</sup>                                             | <i>BRCA1</i>                         |
| Case 11 | gastroesophageal junction (25)                                                                                 | ovarian (paternal grandmother, unknown)<br>breast (paternal aunt, unknown)<br>colon (paternal cousin, under 40)<br>esophageal (maternal aunt, 44)<br>gastric (maternal uncle, 41)<br>gastric (maternal uncle, 59)<br>ovarian (maternal cousin, 33) | early-onset gastric cancer in the context of modified criteria for Lynch syndrome <sup>b</sup> | <i>EPCAM</i><br><i>MSH2</i>          |

**Supplementary Table S5.** Personal and family cancer history in individuals with known or candidate germline structural variants (continued from previous page)

|                                                                                                                                                                                                                                                                                     |                                                                |                                                                                                                                                                                                                                                    |                                                                    |              |
|-------------------------------------------------------------------------------------------------------------------------------------------------------------------------------------------------------------------------------------------------------------------------------------|----------------------------------------------------------------|----------------------------------------------------------------------------------------------------------------------------------------------------------------------------------------------------------------------------------------------------|--------------------------------------------------------------------|--------------|
| Case 12                                                                                                                                                                                                                                                                             | non-small cell lung cancer (50)                                | liver (maternal aunt, unknown)                                                                                                                                                                                                                     | none                                                               | <i>FANCA</i> |
| Case 13                                                                                                                                                                                                                                                                             | infiltrating ductal carcinoma (28)                             | melanoma (paternal aunt, 50)<br>breast (paternal grandmother, 70)<br>melanoma (paternal grandmother, unknown)<br>breast (maternal great-grandmother, 61)<br>pancreatic (maternal great-grandfather, 70)<br>breast (maternal great-great-aunt, 50s) | early-onset breast cancer in the context of familial breast cancer | <i>PALB2</i> |
| Case 14                                                                                                                                                                                                                                                                             | sarcoma (13 and 35)<br>colorectal cancer (40)<br>prostate (50) | prostate (father, 71)<br>lung (father, 74)                                                                                                                                                                                                         | Li-Fraumeni syndrome                                               | <i>TP53</i>  |
| <p><sup>a</sup>Note that Ewing's sarcoma is an atypical phenotype for hereditary breast and ovarian cancer syndrome.<br/> <sup>b</sup>Paternal carrier testing in Case 11 was negative, indicating likely maternal inheritance.<br/> HBOC, hereditary breast and ovarian cancer</p> |                                                                |                                                                                                                                                                                                                                                    |                                                                    |              |

**Supplementary Table S6.** EGA accession numbers corresponding to datasets for cases included in this study

| Case ID | EGA accession   |
|---------|-----------------|
| Case 1  | EGAD00001001968 |
| Case 2  | EGAD00001004606 |
| Case 3  | EGAD00001005762 |
| Case 4  | EGAD00001004695 |
| Case 5  | EGAD00001002591 |
| Case 6  | EGAD00001001308 |
| Case 7  | EGAD00001003056 |
| Case 8  | EGAD00001005763 |
| Case 9  | EGAD00001003673 |
| Case 10 | EGAD00001003658 |
| Case 11 | EGAD00001004904 |
| Case 12 | EGAD00001001966 |
| Case 13 | EGAD00001004923 |
| Case 14 | EGAD00001003049 |
